# Supplementary material
Source: PubMed Central journal article supplement (PMC6449189)

Figure 1c - Mb

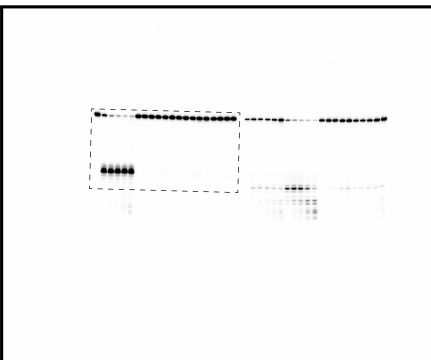

Figure 1c - Lb

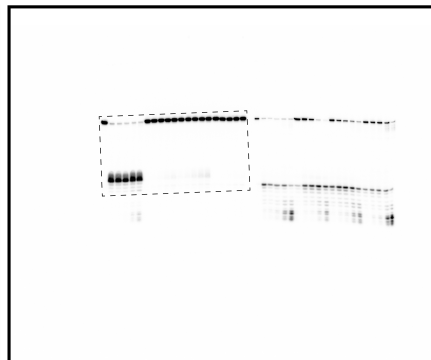

Figure 1c - As

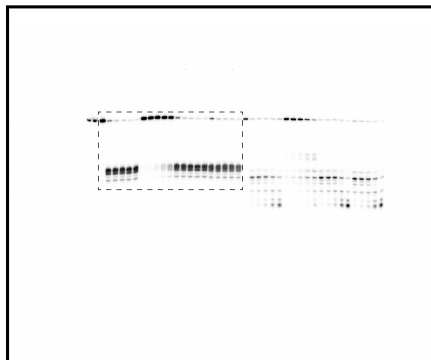

Figure 2a

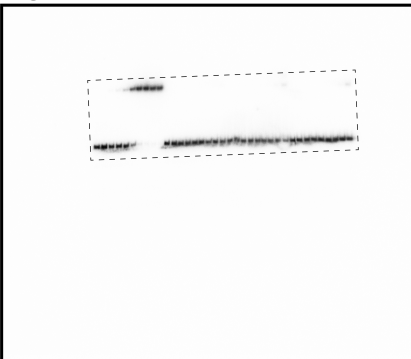

Figure 3b

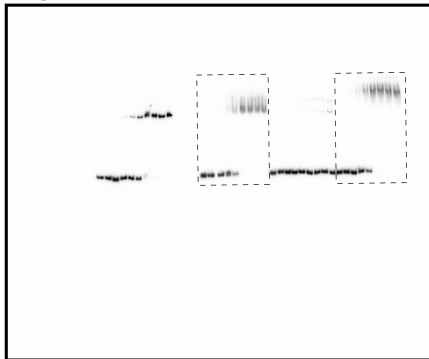

Figure 4a

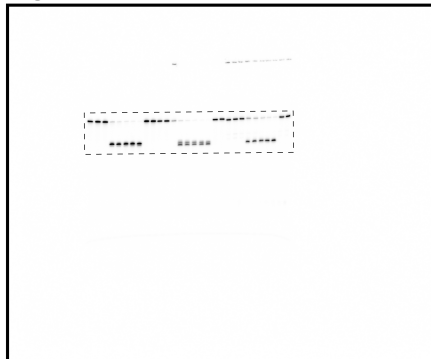

Figure 4c

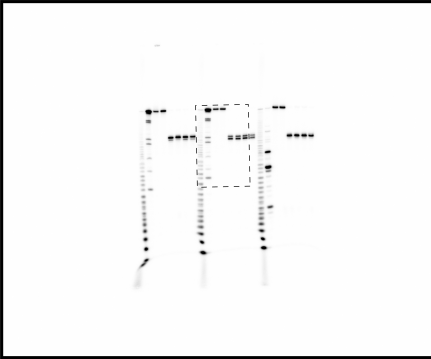

Figure 4d

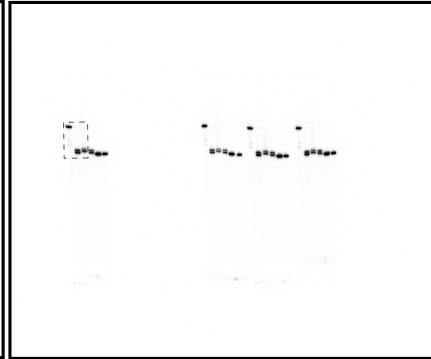

Figure 5b

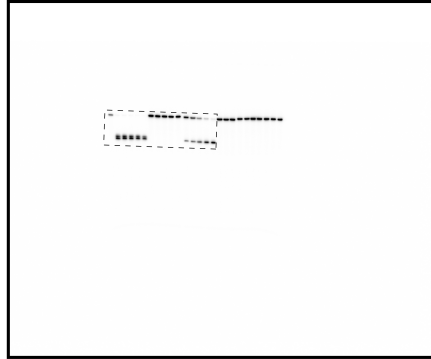

Supplementary Fig. 2b

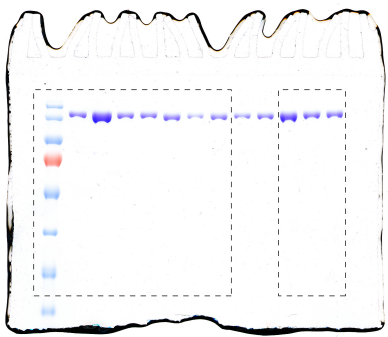

Supplementary Fig. 2b

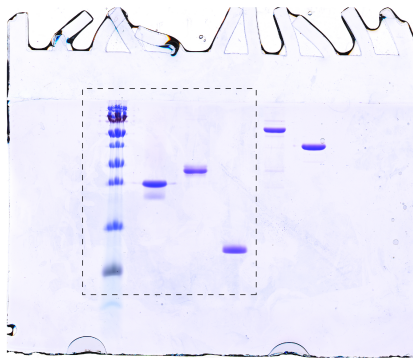

Supplementary Fig. 2b

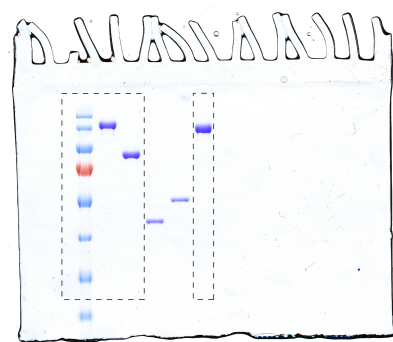

Supplementary Fig. 3a

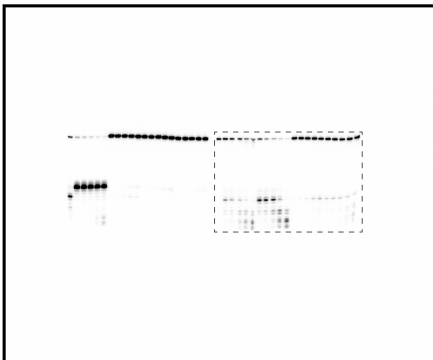

Supplementary Fig. 3b

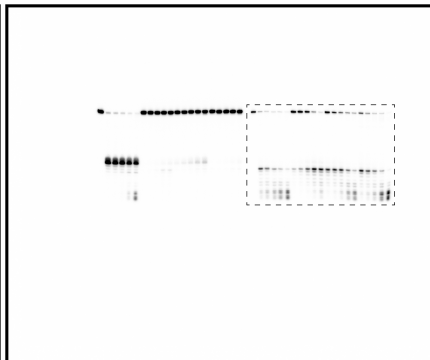

Supplementary Fig. 3c

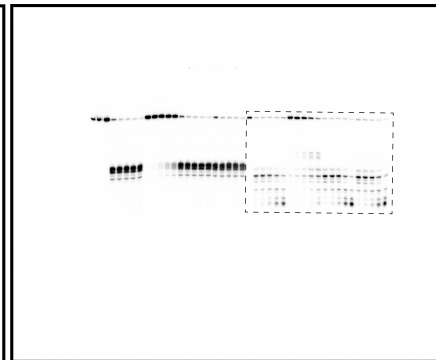

Supplementary Fig. 4a

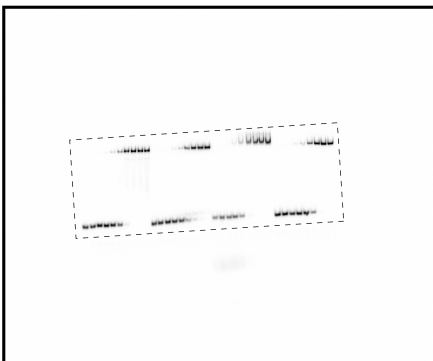

Supplementary Fig. 5a

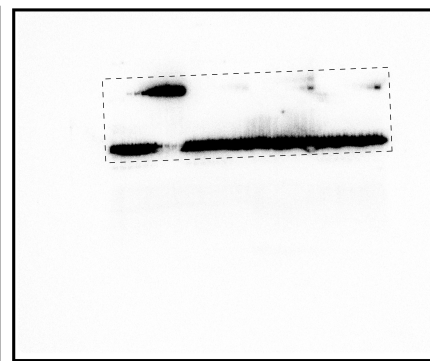

Supplementary Fig. 6a

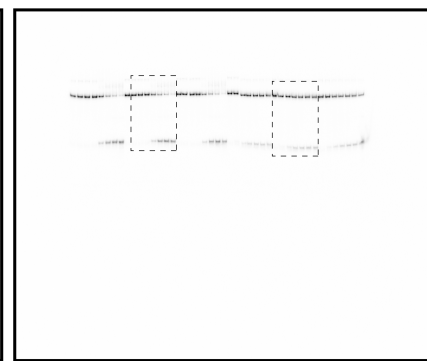

Supplementary Fig. 6a

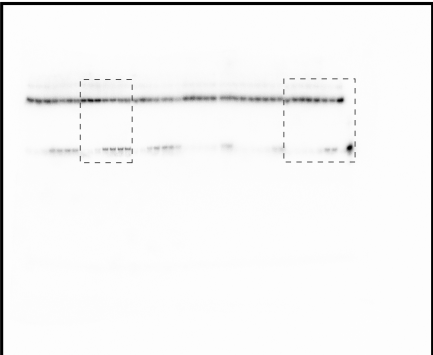

Supplementary Fig. 6b

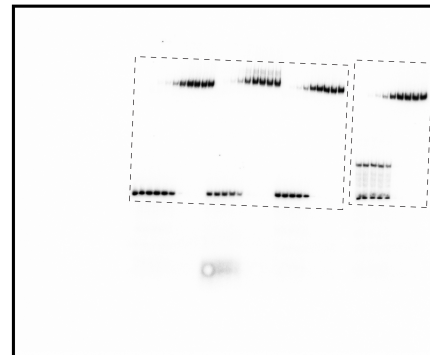

Supplementary Fig. 6c

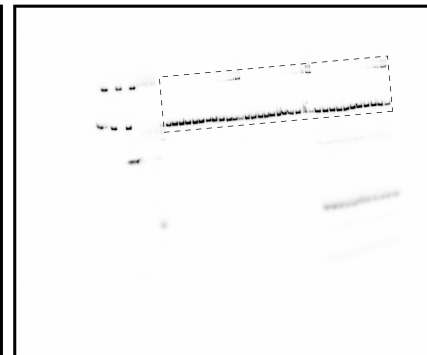

Supplementary Fig. 7a-b

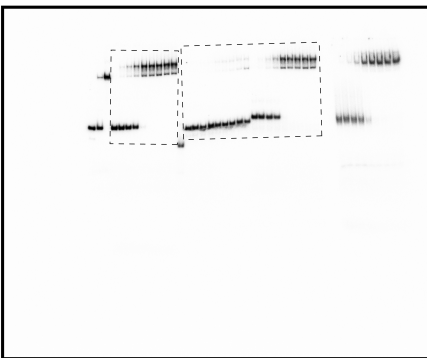

Supplementary Fig. 7c

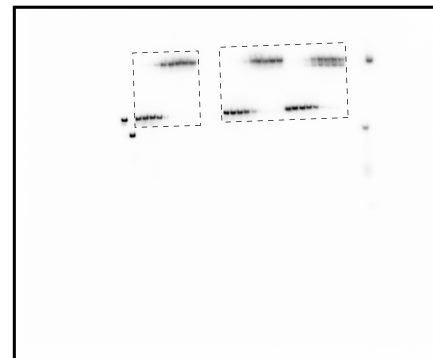

Supplementary Fig. 7d

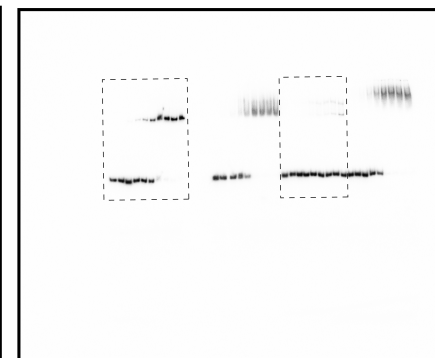

Supplementary Fig. 8a

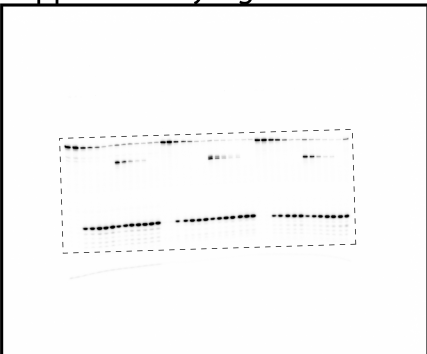

Supplementary Fig. 8b

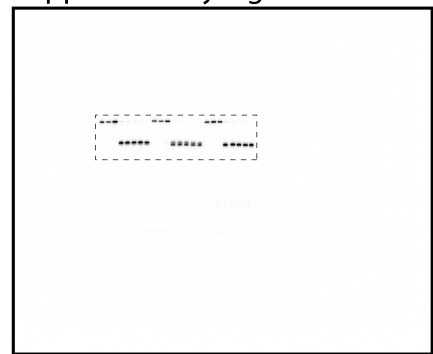

Supplementary Fig. 8c

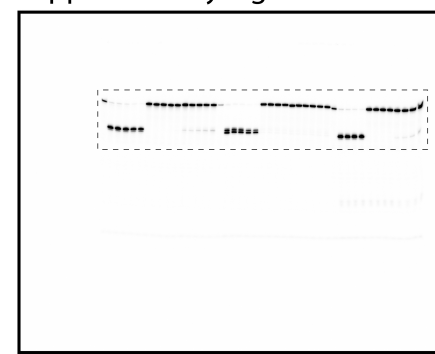

Supplementary Fig. 9a-c

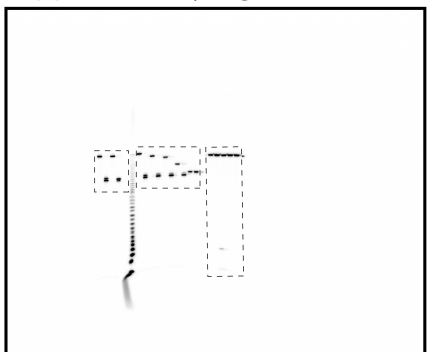

Supplementary Fig. 9d

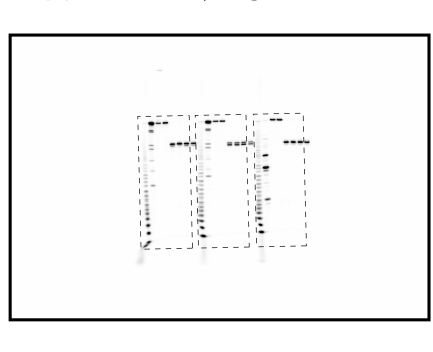

Supplementary Fig. 9e

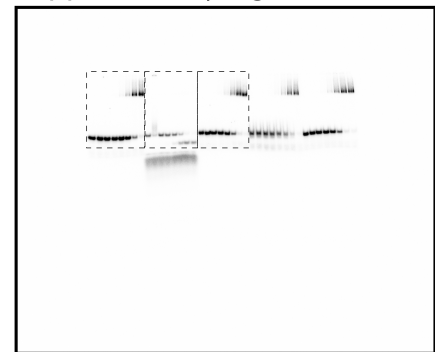

Supplementary Fig. 10a

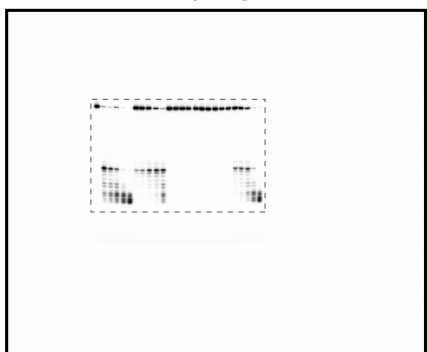

Supplementary Fig. 10b

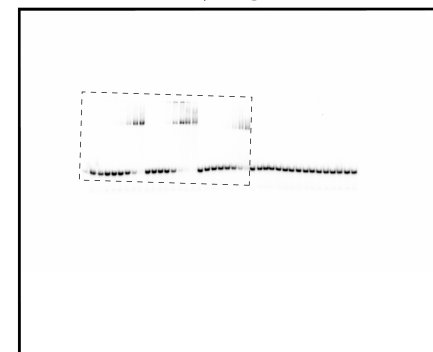

Supplementary Fig. 10c

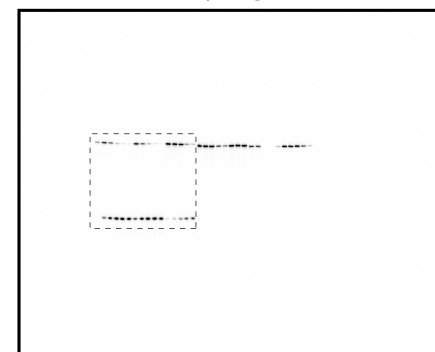

Supplement: NIHMS1522801-supplement-1.pdf [file NIHMS1522801-supplement-1.pdf]
